# Supplementary material for: Body weight influences musculoskeletal adaptation to long-term voluntary wheel running during aging in female mice
Source: publisher site journal article supplement (doi:10.18632/aging.204390), 2022-11-18
Supplement: Supplementary file [file aging-v15i2-204390-supplementary-material-SD2.pdf]

## SUPPLEMENTARY TABLES

**Supplementary Table 1. Pearson correlation analysis of 18 mo old mice.**

| Parameters             | Final body weight |                 | Body weight change |                 | BMAT/TA  |                 | Heart weight |                 | Run distance |                 |
|------------------------|-------------------|-----------------|--------------------|-----------------|----------|-----------------|--------------|-----------------|--------------|-----------------|
|                        | <i>r</i>          | <i>p</i> -value | <i>r</i>           | <i>p</i> -value | <i>r</i> | <i>p</i> -value | <i>r</i>     | <i>p</i> -value | <i>r</i>     | <i>p</i> -value |
| Final Body Weight      |                   |                 | 0.85               | 6.02E-10        | 0.61     | 2.36E-04        | 0.69         | 1.03E-05        |              |                 |
| BW Change              | 0.85              | 6.02E-10        |                    |                 | 0.65     | 6.21E-05        | 0.95         | 2.93E-17        |              |                 |
| BMAT/TA                | 0.61              | 2.36E-04        | 0.65               | 6.21E-05        |          |                 | 0.53         | 1.64E-03        |              |                 |
| Heart Weight           | 0.69              | 1.03E-05        | 0.95               | 2.93E-17        | 0.53     | 1.64E-03        |              |                 |              |                 |
| Heart Weight/BW        | -0.63             | 8.09E-05        | -0.63              | 7.90E-05        | -0.57    | 6.05E-04        | -0.48        | 4.96E-03        |              |                 |
| SOL_Area               | 0.51              | 1.10E-02        | 0.42               | 4.27E-02        |          |                 | 0.44         | 3.02E-02        |              |                 |
| SOL_Muscle Mass/BW     |                   |                 | -0.46              | 6.74E-03        |          |                 |              |                 |              |                 |
| EDL_Muscle Mass/BW     | -0.81             | 7.99E-09        | -0.80              | 3.06E-08        | -0.46    | 8.80E-03        | -0.73        | 1.52E-06        |              |                 |
| EDL_Static CM          |                   |                 |                    |                 |          |                 |              |                 | -0.54        | 2.44E-02        |
| EDL_Contracted CM      |                   |                 |                    |                 |          |                 |              |                 | -0.62        | 8.33E-03        |
| EDL_Total Fiber Number | 0.46              | 2.43E-02        |                    |                 |          |                 |              |                 | 0.62         | 3.00E-02        |
| EDL_Type IIX           |                   |                 | -0.52              | 8.76E-03        |          |                 | -0.57        | 3.50E-03        |              |                 |
| EDL_Submax_Fatigue     | -0.46             | 8.79E-03        | -0.43              | 1.67E-02        |          |                 |              |                 |              |                 |
| EDL_Max_Fatigue        | -0.40             | 2.5E-02         | -0.42              | 1.91E-02        |          |                 |              |                 |              |                 |
| Empty Lacunae          |                   |                 |                    |                 |          |                 |              |                 | -0.69        | 3.91E-02        |
| Co.Th                  | 0.45              | 9.34E-03        | 0.41               | 1.88E-02        |          |                 |              |                 |              |                 |
| Co.Area                | 0.61              | 1.67E-04        | 0.60               | 2.31E-04        | 0.41     | 1.95E-02        | 0.52         | 2.07E-03        |              |                 |
| Ultimate Load          |                   |                 |                    |                 |          |                 |              |                 | -0.79        | 1.09E-02        |
| Total Work to failure  |                   |                 | -0.55              | 2.22E-02        |          |                 | -0.61        | 8.82E-03        |              |                 |
| MOI                    | 0.50              | 2.76E-02        |                    |                 |          |                 |              |                 | 0.69         | 3.79E-02        |

**Pearson correlation analysis of 22 mo old mice.**

| Parameters                           | Final body weight |                 | Body weight change |                 | BMAT/TA  |                 | Heart weight |                 | Run distance |                 |
|--------------------------------------|-------------------|-----------------|--------------------|-----------------|----------|-----------------|--------------|-----------------|--------------|-----------------|
|                                      | <i>r</i>          | <i>p</i> -value | <i>r</i>           | <i>p</i> -value | <i>r</i> | <i>p</i> -value | <i>r</i>     | <i>p</i> -value | <i>r</i>     | <i>p</i> -value |
| BW Change                            |                   |                 |                    |                 |          |                 | -0.57        | 1.99E-02        |              |                 |
| BMAT/TA                              |                   |                 |                    |                 |          |                 | -0.53        | 3.54E-02        |              |                 |
| Heart Weight/BW                      |                   |                 | -0.57              | 1.99E-02        | -0.53    | 3.54E-02        |              |                 |              |                 |
| Total Lateral Heart Width            |                   |                 |                    |                 | -0.65    | 6.60E-03        | 0.74         | 1.10E-03        |              |                 |
| Left Ventricular Wall Thickness      |                   |                 |                    |                 |          |                 | 0.59         | 1.54E-02        |              |                 |
| SOL_Static CM                        | 0.63              | 1.99E-02        |                    |                 |          |                 |              |                 |              |                 |
| SOL_Contracted CM                    | 0.64              |                 |                    |                 |          |                 |              |                 |              |                 |
| SOL_Max_Specific Force               |                   |                 |                    |                 | 0.52     | 4.05E-02        |              |                 |              |                 |
| SOL_Submax_Rate of Force Development | 0.64              |                 |                    |                 |          |                 |              |                 |              |                 |
| SOL_Max_Zero Calcium                 | -0.64             |                 |                    |                 |          |                 |              |                 |              |                 |
| SOL_Submax_Zero Calcium              | -0.68             |                 |                    |                 |          |                 |              |                 |              |                 |
| EDL_Static CM                        | 0.69              |                 |                    |                 |          |                 |              |                 |              |                 |
| EDL_Contracted CM                    | 0.82              |                 |                    |                 |          |                 |              |                 |              |                 |
| EDL_Max_Absolute Force               | 0.62              |                 |                    |                 |          |                 |              |                 |              |                 |
| EDL_Max_Specific Force               | 0.56              |                 |                    |                 |          |                 |              |                 |              |                 |

|                                      |       |       |          |       |          |                |
|--------------------------------------|-------|-------|----------|-------|----------|----------------|
| EDL_Max_Rate of Relaxation           | 0.61  |       |          |       |          |                |
| EDL_Max_Rate of Force Development    | 0.60  |       |          |       |          |                |
| EDL_Submax_Rate of Force Development | 0.55  |       |          | -0.54 | 3.27E-02 |                |
| EDL_Max_Fatigue                      |       |       |          | -0.55 | 2.81E-02 |                |
| EDL_Max_Zero Calcium                 |       | 0.58  | 1.87E-02 |       |          |                |
| EDL_Submax_Zero Calcium              |       |       |          | -0.62 | 9.79E-03 |                |
| EDL_Max_Recovery from Fatigue        |       | -0.58 | 1.91E-02 | -0.53 | 3.43E-02 |                |
| EDL_Submax_Recovery from Fatigue     |       |       |          |       |          | -0.83 1.11E-02 |
| Tb. BV/TV                            | 0.71  |       |          |       |          |                |
| Tb.Th                                |       |       |          | -0.67 | 4.56E-03 |                |
| Tb.N                                 | 0.72  |       |          |       |          |                |
| Tb.Sp                                | -0.62 |       |          |       |          |                |
| Tb.Conn.D                            | 0.80  |       |          |       |          |                |
| Co.Th                                |       |       |          | -0.55 | 2.82E-02 |                |
| Nanoindentation_Young's Modulus      | 0.85  |       |          |       |          |                |
| Nanoindentation_Hardness             | 0.83  | 0.71  | 4.92E-02 |       |          |                |

**Supplementary Table 2. TUNEL assay of femurs from LBW/HBW mice with or without 6 mo endurance exercise.**

| GROUP       | Category I (%)             | Category II (%)           | Category III (%)                                  | Category VI (%)          |
|-------------|----------------------------|---------------------------|---------------------------------------------------|--------------------------|
| <b>CTRL</b> |                            |                           |                                                   |                          |
| <b>CBW</b>  | 35.0 ± 11.1<br>(23.7–55.2) | 30.3 ± 5.7<br>(23.9–38.7) | 27.4 ± 10.1<br>(12.2–42.1)                        | 7.2 ± 5.5<br>(0.7–16.9)  |
| <b>LBW</b>  | 40.2 ± 10.3<br>(31.8–55.2) | 29.8 ± 7.0<br>(23.9–38.7) | 23.7 ± 12.9<br>(12.2–42.1)                        | 6.3 ± 7.3<br>(0.7–16.9)  |
| <b>HBW</b>  | 29.9 ± 10.6<br>(23.7–45.7) | 30.8 ± 5.2<br>(26.3–36.5) | 31.1 ± 6.0<br>(24.9–39.4)                         | 8.2 ± 3.9<br>(2.8–12.1)  |
| <b>VWR</b>  |                            |                           |                                                   |                          |
| <b>CBW</b>  | 34.1 ± 17.0<br>(11.8–59.1) | 28.5 ± 8.4<br>(17.7–42.9) | 27.0 ± 6.6<br>(14.5–34.8)                         | 10.4 ± 8.4<br>(1.4–25.9) |
| <b>LBW</b>  | 25.0 ± 10.7<br>(11.8–36.0) | 27.4 ± 9.4<br>(17.7–37.0) | 34.5 ± 2.6<br>(29.1–34.8)                         | 16.1 ± 8.3<br>(6.4–25.9) |
| <b>HBW</b>  | 41.4 ± 18.6<br>(17.0–59.1) | 29.4 ± 8.5<br>(22.4–42.9) | <b>23.5 ± 6.9<sup>p=0.06</sup></b><br>(14.5–31.3) | 5.7 ± 5.5<br>(1.4–13.2)  |

Data are mean ± SD (range). Abbreviations: CTRL: control group; VWR: voluntary wheel running group; CBW: Combined groups; LBW: Low body weight group; HBW: High body weight group; Category I: Live, Category II: Dying, Category III: Apoptotic, Category VI: Empty lacuna. No significant differences were found compared to the corresponding CTRL, but a decreased trend of category III was observed in HBW/VWR mice ( $p = 0.06$ ).

**Supplementary Table 3. Femoral mechanical properties in LBW/HBW mice with or without 6 mo endurance exercise.**

| GROUP                                     | 18 mo old                    |                            |
|-------------------------------------------|------------------------------|----------------------------|
|                                           | CTRL                         | VWR                        |
| CBW                                       | <i>N</i> = 8                 | <i>N</i> = 9               |
| LBW                                       | <i>N</i> = 4                 | <i>N</i> = 4               |
| HBW                                       | <i>N</i> = 4                 | <i>N</i> = 5               |
| <b>ULTIMATE LOAD (N)</b>                  |                              |                            |
| CBW                                       | 12.7 ± 2.5<br>(10.2–16.9)    | 13.1 ± 3.4<br>(7.0–17.8)   |
| LBW                                       | 12.8 ± 3.0<br>(10.2–16.9)    | 13.6 ± 1.6<br>(12.4–15.8)  |
| HBW                                       | 12.6 ± 2.3<br>(10.2–14.9)    | 12.8 ± 4.6<br>(7.0–17.8)   |
| <b>ELASTIC STIFFNESS (N/mm)</b>           |                              |                            |
| CBW                                       | 57.3 ± 13.6<br>(43.0 – 82.4) | 52.5 ± 14.5<br>(19.9–67.4) |
| LBW                                       | 54.2 ± 11.3<br>(43.0–69.9)   | 50.1 ± 21.9<br>(19.9–67.4) |
| HBW                                       | 60.4 ± 16.7<br>(46.4–82.4)   | 54.4 ± 7.1<br>(45.5–63.0)  |
| <b>ELASTIC MODULUS (GPa)</b>              |                              |                            |
| CBW                                       | 6.0 ± 1.8<br>(4.9–10.1)      | 5.6 ± 1.6<br>(2.8–7.9)     |
| LBW                                       | 6.4 ± 2.4<br>(5.0–10.1)      | 5.5 ± 2.2<br>(2.8–7.9)     |
| HBW                                       | 5.6 ± 0.9<br>(4.9–7.0)       | 5.7 ± 1.3<br>(4.6–7.7)     |
| <b>MOMENT OF INERTIA (mm<sup>4</sup>)</b> |                              |                            |
| CBW                                       | 0.16 ± 0.06<br>(0.10–0.27)   | 0.14 ± 0.02<br>(0.11–0.17) |
| LBW                                       | 0.13 ± 0.02<br>(0.11–0.16)   | 0.13 ± 0.02<br>(0.11–0.16) |
| HBW                                       | 0.18 ± 0.07<br>(0.10–0.27)   | 0.15 ± 0.02<br>(0.13–0.17) |

Data are mean ± SD (range). Abbreviations: CTRL: control group; VWR: voluntary wheel running group; CBW: Combined groups; LBW: Low body weight group; HBW: High body weight group; No significant differences were found compared to the corresponding CTRL.

**Supplementary Table 4. Nanoindentation analysis of femurs from mice with or without long-term endurance exercise.**

| PARAMETER             | 18 mo old                 |                           | 22 mo old                 |                         |
|-----------------------|---------------------------|---------------------------|---------------------------|-------------------------|
|                       | CTRL ( <i>N</i> = 4)      | VWR ( <i>N</i> = 4)       | CTRL ( <i>N</i> = 4)      | VWR ( <i>N</i> = 4)     |
| Hardness (Gpa)        | 1.1 ± 0.6<br>(0.3–1.6)    | 1.6 ± 0.2<br>(1.3–1.7)    | 1.1 ± 0.6<br>(0.3–1.6)    | 0.4 ± 0.4<br>(0.2–1.0)  |
| Young's modulus (GPa) | 21.7 ± 12.6<br>(4.7–33.6) | 30.2 ± 3.4<br>(25.4–33.4) | 21.8 ± 11.8<br>(4.7–30.3) | 7.4 ± 5.6<br>(4.3–15.8) |

Abbreviations: CTRL: control group; VWR: voluntary wheel running group. No significant differences were found when compared to the corresponding CTRL.
